# Supplementary material for: Double-stranded RNA-dependent ATPase DRH-3: INSIGHT INTO ITS ROLE IN RNA SILENCING IN CAENORHABDITIS ELEGANS
Source: PubMed Central journal article supplement — J Biol Chem. 2010 Jun 7;285(33):25363–71. doi: 10.1074/jbc.M110.117010 (PMC2919099; doi:10.1074/jbc.m110.117010), 2010-06-07

## SUPPLEMENTARY FIGURE LEGENDS

*Supplemental Fig. 1.* The DRH/RIG-I/Dicer family of RNA helicases. ClustalW scoring and sequence alignment of helicase motifs from worm (Ce, Cb), mouse (Mm), human (Hs), platypus (Oa), chicken (Gg), fish (Dr), fly (Dm), fungi (Nc), and yeast (Sc) Dicer/DRH/RIG-I orthologs. The conserved helicase motifs (I through VI) are highlighted in red. Motifs specific to Dicer family are highlighted in blue. Divergent sequences are highlighted in green. The long linker region between motifs III and IV is not shown.

*Supplemental Fig. 2.* DRH-3 expression construct and protein preparation. pET-sumo-DRH-3 construct was digested with a single cutter (XbaI) or double cutter (EcoRI) and resolved on 1 % agarose gel (left). Sypro Orange (Invitrogen)-stained 4-20 % gradient gel showing protein preparation of 130 kD full-length DRH-3 (right).

*Supplemental Fig. 3.* DRH-3 binds to and is activated by RNA containing either hydroxyl or triphosphates at their 5' termini. DRH-3 binds untreated (red) and CIP-treated (blue) 18 nt-long transcripts with equal binding constants of ~140 nM (top). A short RNA (18 nt) was chosen to emphasize the effect of the 5' termini on DRH-3 binding. We attribute the observed decrease in affinity for ssRNA to the length of the RNA substrate. Both untreated (solid) and CIP-treated (dashed) blunt duplex stimulate the ATP hydrolysis by DRH-3 with equal efficiency.

*Supplemental Fig. 4.* DRH-3 has a general RNA-stimulated NTPase activity, but does not have unstimulated ATPase activity. (Top) TLC showing ATPase reactions containing 100, 500, and 1000 nM DRH-3 and units of RNaseV1. ATPase activity was monitored over 30 min. Spontaneous hydrolysis (no protein) and positive (100 nM DRH-3 + 100 nM ds25 RNA) controls are shown. (Bottom) TLC showing the general NTPase activity of DRH-3. DRH-3 hydrolyzed all four NTPs, although its ATPase activity was more efficient. (∅) No protein; (-) no RNA; (+) 100 nM ds25 RNA.

*Supplemental Fig. 5.* DRH-3 ATPase activity is stimulated by double-stranded RNA. (A) Thin layer chromatography showing end point ATP hydrolysis (60 min) by 100 nM DRH-3 in the presence of single stranded 25 nt long RNA (left) and 25 bp RNA (right). (B) Analysis of TLC experiment (in A) showing end point ATP hydrolysis (60 min) as a function of RNA concentration. In the presence of ss25 RNA, DRH-3 displayed low levels of ATPase activity (8.7 pmol ATP/min/pmol DRH-3 at 0.5 μM RNA). Detectable ss25-activated ATPase activity required RNA concentrations exceeding 1 μM, despite the fact that DRH-3 binds ssRNA at nanomolar concentrations. By contrast, robust DRH-3 ATPase activity was observed in the presence of duplex RNA of the same sequence (ds25 RNA, 141 pmol ATP/min/pmol DRH-3 at 0.5 μM RNA), even at low RNA concentrations (<100 nM of dsRNA, 39.5 pmol ATP/min/pmol DRH-3 at 50 nM RNA). (C) End point ATPase (60 min) assay showing that 34 bp RNA/RNA (red) and RNA/DNA (black) duplexes stimulate DRH-3 (100 nM) but not DNA/DNA duplex (blue). Data fit best to exponentials with maximum amplitudes of  $0.99454 \pm 0.131$  mM ATP for RNA/RNA duplex,  $0.87847 \pm 0.111$  mM ATP for RNA/DNA duplex, and  $0.001361 \pm 0.000473$  mM ATP for DNA/DNA duplex. Error for each based on fit of the ATPase data.

*Supplemental Fig. 6.* DRH-3 does not unwind RNA duplexes *in vitro*. A 5'-<sup>32</sup>P-radiolabeled RNA duplexes with 18 nt long single-stranded overhangs were incubated for 90 min with DRH-3, increasing concentrations of poly-ribo(I:C), 4 mM ATP, and excess cold 12 mer RNA. The reactions were resolved through a 3 M Urea/0.5X TBE semi-native gel. No unwinding activity

was seen for 12 bp or longer 18 bp RNA duplexes in the presence or absence of dsRNA *in trans*. HCV NS3 was used as a positive control for unwinding (Fig. 4).

*Supplemental Fig. 7.* Analytical ultracentrifugation results showing DRH-3 as a monomer in solution. Sedimentation velocity ultracentrifugation profile of 5 $\mu$ M DRH-3 based on Sedfit (NIH) analysis. The major peak (99%) shows a sedimentation coefficient of 4.5 S, a molecular weight of ~120 kD.

*Supplemental Fig. 8.* High dsRNA concentration inhibits ATP hydrolysis by DRH-3. NADH-coupled ATPase assay confirming results (Figure 5B) that high concentrations of ds25 RNA (>50 nM) inhibits DRH-3 ATPase function.

*Supplemental Table 1:* RNA and DNA oligomers used in our experiments

1) DNA templates for *T7* RNA transcription (T7 binding site underlined; transcript in bold, upon converting T to U in the product)

25mer top strand:

5' -GCGCGCGGTAATACGACTCACTATAGGGTATAGACTGACTAGGATCTCCC-3'

5' -GGGAGATCCTAGTCAGTCTATACCCTATAGTGAGTCGTATTACCGCGCGC-3'

25mer bottom strand:

5' -GCGCGCGGTAATACGACTCACTATAGGGAGATCCTAGTCAGTCTATACCC-3'

5' -GGGTATAGACTGACTAGGATCTCCCTATAGTGAGTCGTATTACCGCGCGC-3'

80mer top strand:

5' -GCGCGCGGTAATACGACTCACTATAGGGAGCACTACGTTCCGGACTAGTGTACTCT  
**GCCTTGGACTGCTGGCCTCCAGGTCTCCCGAACAGTTCCTCACACTCCC**-3'

5' -GGGAGTGTGAGGAACTGTTCCGGGAGACCTGGAGGCCAGCAGTCGCAAGGCAGAGT  
ACACTAGTCCGAACGTAGTGCTCCCTATAGTGAGTCGTATTACCGCGCGC-3'

80mer bottom strand:

5' -GCGCGCGGTAATACGACTCACTATAGGGAGTGTGAGGAACTGTTCCGGGAGACCTG  
**GAGGCCAGCAGTCGCAAGGCAGAGTACACTAGTCCGAACGTAGTGCTCCC**-3'

5' -GGGAGCACTACGTTCCGGACTAGTGTACTCTGCCTTGCAGCTGCTGGCCTCCAGGT  
CTCCCGAACAGTTCCTCACACTCCCTATAGTGAGTCGTATTACCGCGCGC-3'

2) Synthetic RNA and DNA sequences:

34 nt (top strand) RNA:

5' -GGAGUGCAUCUCCUCCUCCUUCUUCUGGUC-3'

34 nt (top strand) DNA:

5' -GGAGTGCATCTCCTTCCCTCCTTCTGGTC-3'

54 nt (bottom strand) RNA:

5'-GACCAGAAGGAAAGGAGGGAAGGAGAUGCACUCCACUGACUAACACGUACU  
AAC-3'

54 nt (bottom strand) DNA:

5'-GACCAGAAGGAAAGGAGGGAAGGAGATGCACTCCACTGACTAACACGTACTAAC-3'

| Figure S1 | Motif II                                                                                                         | Motif Ia                                                                                        | Motif Ib |
|-----------|------------------------------------------------------------------------------------------------------------------|-------------------------------------------------------------------------------------------------|----------|
| CeDRH-3   | QEEELVQPALEGNKNCVVA <b>PTGSGKTE</b> VAIAAALNKHIBERTSQ----                                                        | GKPS <b>RVVLLVVKIP</b> LVGQOK--DRFLKYCNGMYEVNGFHGSESSVSGTGRRDEVIATHVSV <b>VMT</b> PQILINMLQSVR  | 115      |
| CbDRH-3   | QEEELVQPALEGNKNCVVA <b>PTGAGKTE</b> VAIAAALNKHIBERTSQ----                                                        | EKAAR <b>RVVLLVVKIP</b> LVGQOK--ERFLKYCAGQYHVCIGHSEKSDTGEVRDDVLAQIIV <b>VMT</b> PQILINMLQSVR    | 115      |
| CbDRH-1   | QLEELCQVALRGENTIVT <b>PTGSGKTE</b> VIAAANIKNHFPETDRDN----                                                        | GQRF <b>KALFMT</b> PNSMILKQOS--DISISSYLKHSYQVIVQGD--NLRVTR--NAVQTKDIL <b>VAT</b> PQIMVNLNCEHR   | 111      |
| CeDRH-1   | QEEELCQVALQGNKNTIVT <b>PTGSGKTE</b> VIAAANIKEHFESRSSE----                                                        | GKRF <b>KALFMT</b> PNSMILNQA--ASISSYLHDVYHTQIQGSD--NVPT--NVIQSKDLI <b>VAT</b> PQIMVNLNCEHR      | 111      |
| MmRIG-I   | QLELALPAKKGKNTIIC <b>PTGCGKT</b> FVSLICEHHLKFPQ----                                                              | GQKG <b>KVVFANQI</b> PVYEQATVFSRYFERLGYNIASISGATSDSVSVQ--HIIEBNDII <b>ILTP</b> QILVNLNNGA       | 113      |
| HsRIG-I   | QLELALPAMKGNNTIIC <b>PTGCGKT</b> FVSLICEHHLKFPQ----                                                              | GQKG <b>KVVFANQI</b> PVYEQKSVFSKYFERHGYRVTVGISGATAENVPVE--QIVENNDII <b>ILTP</b> QILVNLNKGKT     | 113      |
| OaRIG-I   | QMEALAKPALVGKNTIIC <b>PTGSGKTE</b> FVAIIMCKNHLKQMPN----                                                          | GQKG <b>KVVFVLT</b> KVPLVEQKAVFIEQFERESYTVAGISGETAGTPE--HVIKNSDII <b>ILTP</b> QILVNLNKGKT       | 113      |
| MmMDA-5   | QMEVAQPALDGKNIIC <b>CLPTGSGKTR</b> VAVYITKDHLDKQKQ----                                                           | SESG <b>KVIVLVNKVM</b> LAEQLFRKFNPNYKWKYRIGLSGDTQLKISFP--EVLKSYDVI <b>ISTA</b> QILENSLLNLE      | 114      |
| HsMDA-5   | QMEVAQPALGKNIIC <b>CLPTGSGKTR</b> VAVYIAKDHLDKQKQ----                                                            | SESG <b>KVIVLVNKV</b> LVEQLFRKFPFLKWKYRIVIGLSGDTQLKISFP--EVLKSYDVI <b>ISTA</b> QILENSLLNLE      | 114      |
| GgMDA-5   | QMEVAKPALGKNIIC <b>CLPTGSGKTR</b> VAVYITKDHLDKQKQ----                                                            | SESG <b>KVIVLVNKV</b> LVEQLFRKFNPNYKWKYRIVIGLSGDSSELKISFP--EVLKRYDVI <b>ICTA</b> QILENSLLNAT    | 114      |
| DrMDA-5   | QMEVAKPALGKNIIC <b>CLPTGSGKTR</b> VAVYITKDHLDKQKQ----                                                            | SESG <b>KVIVLVNKV</b> LVEQLFRKFNPNYKWKYRIVIGLSGDSSELKISFP--EVLKRYDVI <b>ICTA</b> QILENSLLNAT    | 114      |
| MmLGP2    | QWEVILPALEGNKNIIC <b>WLP</b> PTGAGKTRAAAFVAKRHLET-----                                                           | VDRG <b>KVVVLVNRV</b> HLVLSQHA--EERFRMLDKHWTVTTLSDGMDGSRAGFG--LMARSHDLL <b>ICTA</b> ELLQALNLSSE | 109      |
| HsLGP2    | QWEVIMPALGKNIIC <b>WLP</b> PTGAGKTRAAAFVAKRHLET-----                                                             | VDGA <b>KVVVLVNRV</b> HLVLTQHG--EERFRMLDGRWTVTTLSDGMDGPRAGFG--HLARCHDLL <b>ICTA</b> ELLQALNLSSE | 109      |
| MmDCR-1   | QVELLEAALD--HNTIVCL <b>NTGSGKTF</b> IAVLLTKELAHQIRGDLN--                                                         | PHAK <b>RTVFLVNSAN</b> QVAQVSAVRTHSDLVKVEYSLE--VNASWTKERWSQEFTHKQV <b>IMTC</b> YVALTVLKNKY      | 116      |
| HsDCR-1   | QVELLEAALD--HNTIVCL <b>NTGSGKTF</b> IAVLLTKELAHQIRGDLN--                                                         | PHAK <b>RTVFLVNSAN</b> QVAQVSAVRTHSDLVKVEYSLE--VNASWTKERWSQEFTHKQV <b>IMTC</b> YVALTVLKNKY      | 116      |
| DrDCR-1   | QVELLEAALD--HNTIVCL <b>NTGSGKTF</b> IAVLLTKELAHQIRGDLN--                                                         | PHAK <b>RTVFLVNSAN</b> QVAQVSAVRTHSDLVKVEYSLE--VNASWTKERWSQEFTHKQV <b>IMTC</b> YVALTVLKNKY      | 116      |
| DmDCR-1   | QVELLEAALD--HNTIVCL <b>NTGSGKTF</b> IAVLLTKELAHQIRGDLN--                                                         | PHAK <b>RTVFLVNSAN</b> QVAQVSAVRTHSDLVKVEYSLE--VNASWTKERWSQEFTHKQV <b>IMTC</b> YVALTVLKNKY      | 116      |
| CeDCR-1   | QVELLEAALD--HNTIVCL <b>NTGSGKTF</b> IAVLLTKELAHQIRGDLN--                                                         | PHAK <b>RTVFLVNSAN</b> QVAQVSAVRTHSDLVKVEYSLE--VNASWTKERWSQEFTHKQV <b>IMTC</b> YVALTVLKNKY      | 116      |
| NcDCL1    | QVELFERAKQ--NTIAV <b>LVLTGSGKTF</b> IAVLLRWITGELEDREKGLPRR <b>IAF</b> LVLDKVALVFLQYHKSFLTKNLDLFCGEMVEGVSQKISFP-- | QIIEKNSDII <b>ILTP</b> QILVNLNKGKT                                                              | 118      |
| DmDCR-2   | QRLRLVDHLTK--SNGIV <b>LVPTGSGKTF</b> FAIILVLRKFSQDFDKPIE--                                                       | SGG <b>KRALFMCNT</b> VELARQAMAVRRCTNFVKGFYVGEQVDDWTRGMWS--DEIKKNQV <b>LVGT</b> AQVFLDMVTQTY     | 116      |
| ScMPH1    | QYTVIHKSLF--QNTLCAI <b>PTGMGKT</b> FIASTVMLNFRWTKA-----                                                          | <b>KIIFTAPTR</b> LVAQQIKACLGITGIP--SDQTAILDKSRKRNREI <b>WANKRVF</b> FATPQVV <b>EN</b> DLKRGV    | 107      |

|         | Motif II                                                                                         | Motif III                                                                         |     |
|---------|--------------------------------------------------------------------------------------------------|-----------------------------------------------------------------------------------|-----|
| CeDRH-3 | QNE-----RLYVSDFSMM <b>IFDEVH</b> KAA--KNHPYVLINQMVQEWKYEK-----                                   | PQI <b>IGLTAS</b> LVNKVQDQKDNQMLNDIYNMLALINAPHLSTITRQSSIDELNEHVG                  | 212 |
| CbDRH-3 | RNE-----RLYVSDFSMM <b>VFDEVH</b> KTS--GNHPYVLINRLVQEWYK-----                                     | PQI <b>IGLTAS</b> LVNNAKVHVTETSAMLGNIYTMALLNTPCLSSITHQASIDELNEHVT                 | 212 |
| CbDRH-1 | DVLTKTENIEIGIQFLLSTFTI <b>IFDECH</b> NTM--KNTPYANIMREYHTLKNMGN----                               | MPDGH <b>LPQI</b> V <b>GLTAS</b> LGTDG--KNVLGVKEHIANLCAMMDVKELSTVR--ENTEELQNYSP   | 221 |
| CeDRH-1 | NSLDDSERL--DQFFLSTFTI <b>IFDECH</b> NTV--KNSPYSNIMREYHYLKNMGN----                                | MPEGH <b>SLPQI</b> V <b>IGLTAS</b> LVGTGK--NDCLQVRNYIAGLCASMDVKLSIVK--DNLEELRGYSP | 219 |
| MmRIG-I | IP-----SLSVFTLM <b>IFDECH</b> NHS--KQHPYNMIMFNLYDQKLG-----                                       | SSG <b>PLPQV</b> V <b>IGLTAS</b> LVGTGK--KNTDEALDYICKLCASLDASVIATVK--HNLEELQVYV   | 208 |
| HsRIG-I | IP-----SLSVFTLM <b>IFDECH</b> NHS--KQHPYNMIMFNLYDQKLG-----                                       | SSG <b>PLPQV</b> V <b>IGLTAS</b> LVGTGK--KNTDEALDYICKLCASLDASVIATVK--HNLEELQVYV   | 208 |
| OaRIG-I | VP-----SLSMFTLM <b>IFDECH</b> NTD--KSHPYNKIMINYLKDLKGT-----                                      | SAC <b>QLPQI</b> V <b>IGLTAS</b> LVGTGK--KKNKEATQHIKCLCACLDAPIGSTVR--ENLDDLEKIVK  | 208 |
| MmMDA-5 | SGD-----DDGVQLSDFSLI <b>IIDECH</b> HNT--KEAVYNNIMRRLYKQKLNNDLKKQKPAIPLPQI <b>IGLTAS</b> LVGTGK-- | KKQSEAEKHILNICANLDAFTIKTVK--ENLQGLKHQIK                                           | 222 |
| HsMDA-5 | NGE-----DAGVQLSDFSLI <b>IIDECH</b> HNT--KEAVYNNIMRRLYKQKLNNDLKKQKPAIPLPQI <b>IGLTAS</b> LVGTGK-- | KTQAEAEKHILNICANLDAFTIKTVK--ENLQGLKHQIK                                           | 222 |
| GgMDA-5 | E-E-----DESVRLSDFSLI <b>IIDECH</b> HNT--KEGVYNNIMRRLYKKEIKNRKQAKENKPLIPQ <b>IGLTAS</b> LVGTGK--  | RNSKAEKHILNICANLDAFTIKTVK--EHASQLKNQVK                                            | 221 |
| DrMDA-5 | NGD-----EDGIELSQFTLM <b>VIDECH</b> HHT--KGGVYNNIMRRLYKQKLNNDLKKQKPAIPLPQI <b>IGLTAS</b> LVGTGK-- | VSQQMAEELIQLICANLDAFTIKTVK--FEE---EAK                                             | 218 |
| MmLGP2  | E-----DEHVELREFSLI <b>VVDECH</b> HHT--KDTVYNTILSRYLEQKLLK-----                                   | AEP <b>LPQV</b> V <b>IGLTAS</b> LVGTGK--TKLQGAIDHILQCANLDTCHIMSPK--NCYSQQLMHPN    | 206 |
| HsLGP2  | E-----BEHVELTVFSLI <b>VVDECH</b> HHT--KDTVYNNIMSRYLEQKLLK-----                                   | AEP <b>LPQV</b> V <b>IGLTAS</b> LVGTGK--TKLQGAIDHILQCANLDTCHIMSPK--NCYSQQLMHPN    | 206 |
| MmDCR-1 | LS-----LSDINLL <b>VFDECH</b> LAI--LDHPYREIMK--LCESCP-----                                        | SCPRI <b>IGLTAS</b> LVGTGK--KKNKEATQHIKCLCACLDAPIGSTVR--ENLDDLEKIVK               | 208 |
| HsDCR-1 | LS-----LSDINLL <b>VFDECH</b> LAI--LDHPYREIMK--LCENCP-----                                        | SCPRI <b>IGLTAS</b> LVGTGK--KKNKEATQHIKCLCACLDAPIGSTVR--ENLDDLEKIVK               | 208 |
| DrDCR-1 | LP-----LSSINLL <b>VFDECH</b> LAI--TGHPYREIMK--ICEGPC-----                                        | SCPRI <b>IGLTAS</b> LVGTGK--KKNKEATQHIKCLCACLDAPIGSTVR--ENLDDLEKIVK               | 204 |
| DmDCR-1 | LL-----LSSVLEI <b>VLEDCH</b> DASA--VYQRIPLFENHIMPAPPA-----                                       | DRPRI <b>IGLTAS</b> LVGTGK--KKNKEATQHIKCLCACLDAPIGSTVR--ENLDDLEKIVK               | 204 |
| CeDCR-1 | LK-----IEDMCVL <b>IFDECH</b> HALGSQHPYRSIMVDYKLLKDK-----                                         | PVPRV <b>IGLTAS</b> LVGTGK--KKNKEATQHIKCLCACLDAPIGSTVR--ENLDDLEKIVK               | 213 |
| NcDCL1  | IR-----MDQINLL <b>IFDEAH</b> HTK--KDHPYRIIKNFIIDBQLE-----                                        | RRPRI <b>IGLTAS</b> LVGTGK--KKNKEATQHIKCLCACLDAPIGSTVR--ENLDDLEKIVK               | 211 |
| DmDCR-2 | VA-----LSSVLEI <b>VIDECH</b> HGT--GHHPREFMRLFTIANQTK-----                                        | LPRV <b>VGLT</b> GVLIKGNE--ITNVATKLELEITYRGINITVSDTKEMENVMLYATKPT                 | 209 |
| ScMPH1  | LDP-----KDIIVCL <b>VIDE</b> AHRAT--GSSAYTNNVVKFIDRANSSY-----                                     | RL <b>LAL</b> TATPA <b>ESD</b> IEGVVNNLIDISKIEIRTEESMDIVKMKRKRKEKIEVPLL           | 198 |

|         | Motif IV                                                                                     | Motif V                                                                              |     |
|---------|----------------------------------------------------------------------------------------------|--------------------------------------------------------------------------------------|-----|
| CeDRH-3 | RLKNTLTNQFHVAPES-----RV <b>II</b> FVTRQ <b>ST</b> AQRVSDFLNESK--VLDQFGNYG--EQMVG             | YVLTGKNGQAVQQT <b>SVVEEG</b>                                                         | 466 |
| CbDRH-3 | KLKDTLITQFATIPDS-----RV <b>II</b> FVTRQ <b>ST</b> AQRVSDFLNRSEEVMKQLSSSGDKREDMIGYV           | LVLTGKNGQAVQQT <b>SVVEEG</b>                                                         | 468 |
| CbDRH-1 | KVEQFIVDQNEQRGDS-----RS <b>II</b> FVTR <b>RYE</b> ATILNKLNRKE-----                           | TLERLGIKSEVILGNKSTSSADIASHVLQKQMEKLRKFAIRV <b>LV</b> TS <b>VAE</b> EG                | 489 |
| CeDRH-1 | KTVQYIVEQNLQRADS-----RT <b>II</b> FVTR <b>RYE</b> ATILNKLNSNE-----                           | ELMLGIKSEWMSGLNKSTASSADIASKQKQMEKLMKMFADGEIRIL <b>LV</b> TS <b>VAE</b> EG            | 483 |
| MmRIG-I | DLYLVLQEEYHLKPEP-----KT <b>IL</b> FVKTR <b>AL</b> VDALKKWIEENP--ALSFL--                      | KPGIL <b>TGR</b> GTNRATGM <b>TL</b> PAQKCVLEAFRAS--GDNNIL <b>IA</b> TS <b>VAD</b> EG | 457 |
| HsRIG-I | DLCFILQEEYHLNPEP-----IT <b>IL</b> FVKTR <b>AL</b> VDALKNWIEGNP--KLSFL--                      | KPGIL <b>TGR</b> GTNRATGM <b>TL</b> PAQKCVLEAFRAS--GDNNIL <b>IA</b> TS <b>VAD</b> EG | 457 |
| OaRIG-I | ELCFLLQEEYHLNPEP-----RT <b>IL</b> FVKTR <b>AL</b> VDALKKWIEENP--KLDYL--                      | KSDVLMGRGKRNQATGM <b>TL</b> PLQKDVLETFKAS--GETKVL <b>IA</b> TS <b>VAD</b> EG         | 457 |
| MmMDA-5 | KLRNTILEQFTRSEESS-----RG <b>II</b> F <b>TK</b> TRQ <b>ST</b> YALSQWIMENA--KFAEVGVKAHHLIGAGHS | SEVKPMTQTEQKEVISKFR--GEINLL <b>IA</b> TS <b>VAE</b> EG                               | 483 |
| HsMDA-5 | KLRNTIMQFTRTEESA-----RG <b>II</b> F <b>TK</b> TRQ <b>ST</b> YALSQWITENE--KFAEVGVKAHHLIGAGHS  | SEVKPMTQTEQKEVISKFR--GEINLL <b>IA</b> TS <b>VAE</b> EG                               | 484 |
| GgMDA-5 | KLRNTLMEEFKTEEP-----RG <b>II</b> F <b>TK</b> TRQ <b>ST</b> YALSQWIMDNP--KFEVGVKAHHLIGAGHS    | SEVKPMTQTEQKEVISKFR--GEINLL <b>IA</b> TS <b>VAE</b> EG                               | 465 |
| DrMDA-5 | QLKTIILKEFS--TREKA-----RG <b>II</b> F <b>TK</b> TRQ <b>ST</b> YALSQWIEENP--KFEVGVKAHHLIGAGHS | SEVKPMTQTEQKEVISKFR--GEINLL <b>IA</b> TS <b>VAE</b> EG                               | 458 |
| MmLGP2  | MLERILLKQFG--SPGHT-----RG <b>II</b> F <b>TK</b> TRQ <b>ST</b> YALSQWIEENP--KFEVGVKAHHLIGAGHS | SEVKPMTQTEQKEVISKFR--GEINLL <b>IA</b> TS <b>VAE</b> EG                               | 438 |
| HsLGP2  | MLEKILQRFQS--SSNSP-----RG <b>II</b> F <b>TK</b> TRQ <b>ST</b> YALSQWIEENP--KFEVGVKAHHLIGAGHS | SEVKPMTQTEQKEVISKFR--GEINLL <b>IA</b> TS <b>VAE</b> EG                               | 438 |
| MmDCR-1 | EKEKPE--TNFSPFTN-----ILCG <b>IF</b> V <b>RRY</b> TAVVNLRLIKEAGQDPPELAYISSNFITGHG             | IGKNQPRSKQMAEAFRQKEVLRKFAHETNLL <b>IA</b> TS <b>VVE</b> EG                           | 478 |
| HsDCR-1 | EKEKPE--TNFSPFTN-----ILCG <b>IF</b> V <b>RRY</b> TAVVNLRLIKEAGQDPPELAYISSNFITGHG             | IGKNQPRSKQMAEAFRQKEVLRKFAHETNLL <b>IA</b> TS <b>VVE</b> EG                           | 478 |
| DrDCR-1 | AKEKTE--ANFSPFTN-----ILCG <b>IF</b> V <b>RRY</b> TAVVNLRLIKEAGQDPPELAYISSNFITGHG             | IGKNQPRSKQMAEAFRQKEVLRKFAHETNLL <b>IA</b> TS <b>VVE</b> EG                           | 474 |
| DmDCR-1 | AKPKPSSGANTAQPRTRRRVYTRRHRDHNDGSDTLCAL <b>Y</b> IC <b>YNQ</b> HTARVLFPELLAEISR               | RDPDLKFLRCQYTTDR--VADPTTPEKAELEHRRQEVLRKFRMHDCNV <b>IG</b> TS <b>VLE</b> EG          | 555 |
| CeDCR-1 | KAHLS-----AI <b>IF</b> V <b>DQ</b> RY <b>I</b> AYSLLLMRRHISWEPKFKFVNPDYVVGASGRNLAS--         | SDS <b>QGL</b> HKRQTEVLRFRHNEINCL <b>IA</b> TS <b>VLE</b> EG                         | 450 |
| NcDCL1  | MLVRILRDQFERGVGAQ-----RC <b>II</b> F <b>V</b> RRY <b>T</b> AVVNLRLIKEAGQDPPELAYISSNFITGHG    | IGKNQPRSKQMAEAFRQKEVLRKFAHETNLL <b>IA</b> TS <b>VVE</b> EG                           | 422 |
| DmDCR-2 | RFLMSLKVSFADKDPK-----IC <b>CL</b> V <b>F</b> RRY <b>T</b> CKCIYGLLLNYIQS--TPELRNVLT          | PQFMVGRNISPDPFESVLERKWKQSAIQFRDGNAN <b>LM</b> IC <b>SS</b> V <b>VLE</b> EG           | 456 |
| ScMPH1  | PHIFIGQARAKGDFVEKYT-----RK <b>HAP</b> K <b>R</b> KK <b>V</b> ERLHRQEQEKFLAEARTKRAANDK        | LEERSARRTGSSEAAQISGMNQKMQKEV <b>I</b> HNFKKGEYV <b>LV</b> CT <b>S</b> IG <b>EE</b> G | 490 |

|         | Motif VI                                                                    |  |
|---------|-----------------------------------------------------------------------------|--|
| CeDRH-3 | -LDVTACNLI <b>IKY</b> NCSSGSAIQ <b>LV</b> QQ <b>RGR</b> ARAK--- 498         |  |
| CbDRH-3 | -LDVAACNLI <b>IKY</b> NCSSGSAIQ <b>LV</b> QQ <b>RGR</b> ARAK--- 500         |  |
| CbDRH-1 | -LDVAECNLI <b>IKY</b> NYATN- <b>EIA</b> HVQR <b>RGR</b> GRAM--- 520         |  |
| CeDRH-1 | -LDVPECSLVI <b>IKY</b> NYATN- <b>EIA</b> HVQR <b>RGR</b> GRAL--- 514        |  |
| MmRIG-I | -IDIAECNLI <b>VIL</b> YEVGN-VIKMIQ <b>TR</b> GRGRAR--- 488                  |  |
| HsRIG-I | -IDIAECNLI <b>VIL</b> YEVGN-VIKMIQ <b>TR</b> GRGRAR--- 488                  |  |
| OaRIG-I | -IDIAECNLI <b>VIL</b> YEVGN-VIKMIQ <b>TR</b> GRGRAR--- 488                  |  |
| MmMDA-5 | -LDIKECNIVIRYGLVTN- <b>EIA</b> MVQ <b>AR</b> GRARAD--- 514                  |  |
| HsMDA-5 | -LDIKECNIVIRYGLVTN- <b>EIA</b> MVQ <b>AR</b> GRARAD--- 515                  |  |
| GgMDA-5 | -LDIKECNIVIRYGLVTN- <b>EIA</b> MVQ <b>AR</b> GRARAD--- 496                  |  |
| DrMDA-5 | -LDIAECNIVIRYGLVTN- <b>EV</b> AMIQ <b>AR</b> GRARAD--- 489                  |  |
| MmLGP2  | -LDIAECNIVVRYGLLTN- <b>EIS</b> MVQ <b>AR</b> GRARAD--- 469                  |  |
| HsLGP2  | -LDI <b>PH</b> CNIVVRYGLLTN- <b>EIS</b> MVQ <b>AR</b> GRARAD--- 469         |  |
| MmDCR-1 | -VDIPKCNLVVRFDLPT <b>E</b> -YRSYVQ <b>S</b> K <b>GR</b> ARAP--- 509         |  |
| HsDCR-1 | -VDIPKCNLVVRFDLPT <b>E</b> -YRSYVQ <b>S</b> K <b>GR</b> ARAP--- 509         |  |
| DrDCR-1 | -VDIPKCNLVVRFDLPT <b>E</b> -YRSYVQ <b>S</b> K <b>GR</b> ARAPV--- 506        |  |
| DmDCR-1 | -IDVPKCNLVVWDPPPT <b>T</b> -YRSYVQ <b>C</b> K <b>GR</b> ARAA--- 586         |  |
| CeDCR-1 | -VDVKQCNLVIKFDRPLD- <b>MRS</b> YVQ <b>S</b> K <b>GR</b> ARRAG--- 482        |  |
| NcDCL1  | -LDIPDCNIVIRFDLYD <b>T</b> -LIQCI <b>Q</b> S <b>R</b> GRARRP--- 453         |  |
| DmDCR-2 | -IDVQACNHVILDPVKT <b>T</b> -FNMYVQ <b>S</b> K <b>GR</b> ART <b>E</b> AK 490 |  |
| ScMPH1  | -LDIGEVDLI <b>IC</b> YDTTSS-PIKNIQ <b>R</b> M <b>GR</b> TGRK--- 521         |  |

Figure S2

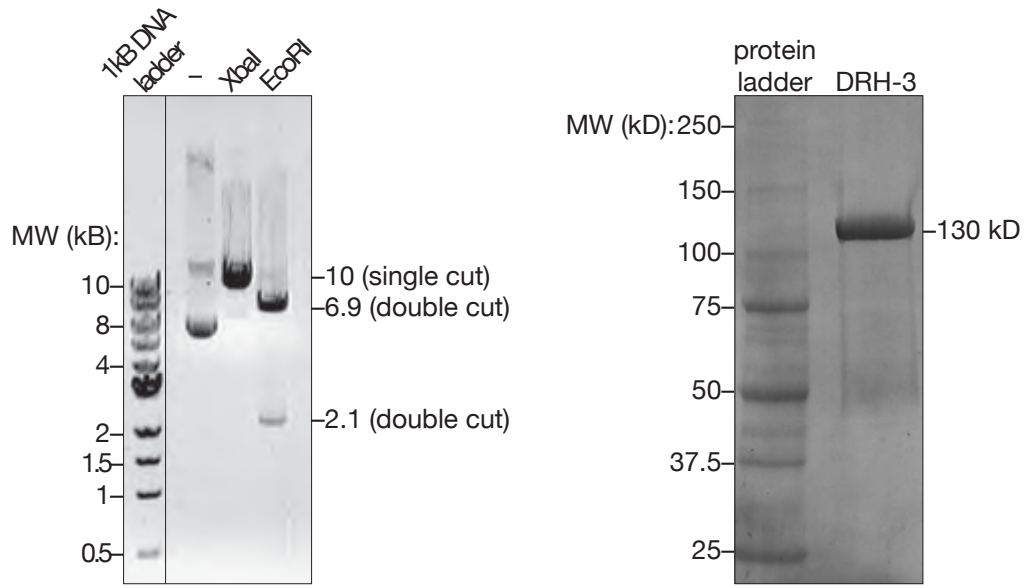

Figure S3

### RNA binding (Double Filter Method):

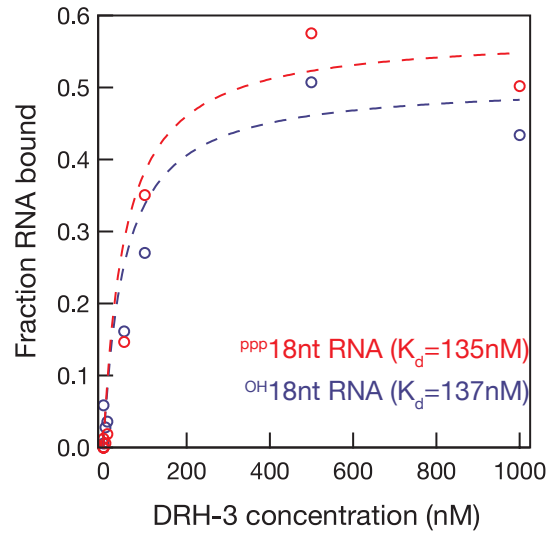

### ATPase activity (TLC):

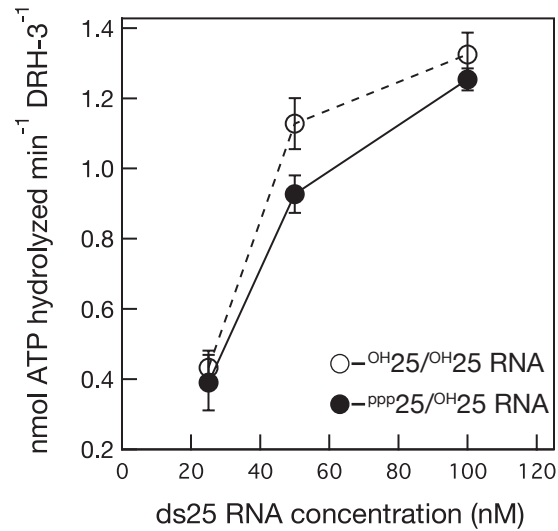

Figure S4

### Unstimulated ATPase Activity:

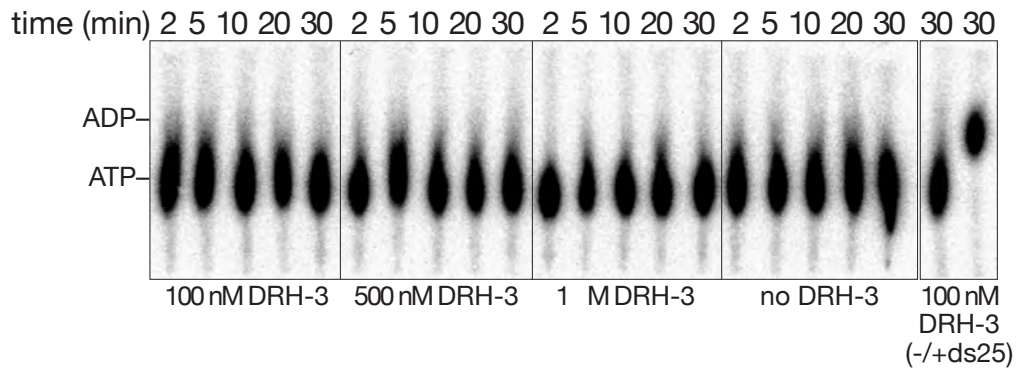

### NTPase activity:

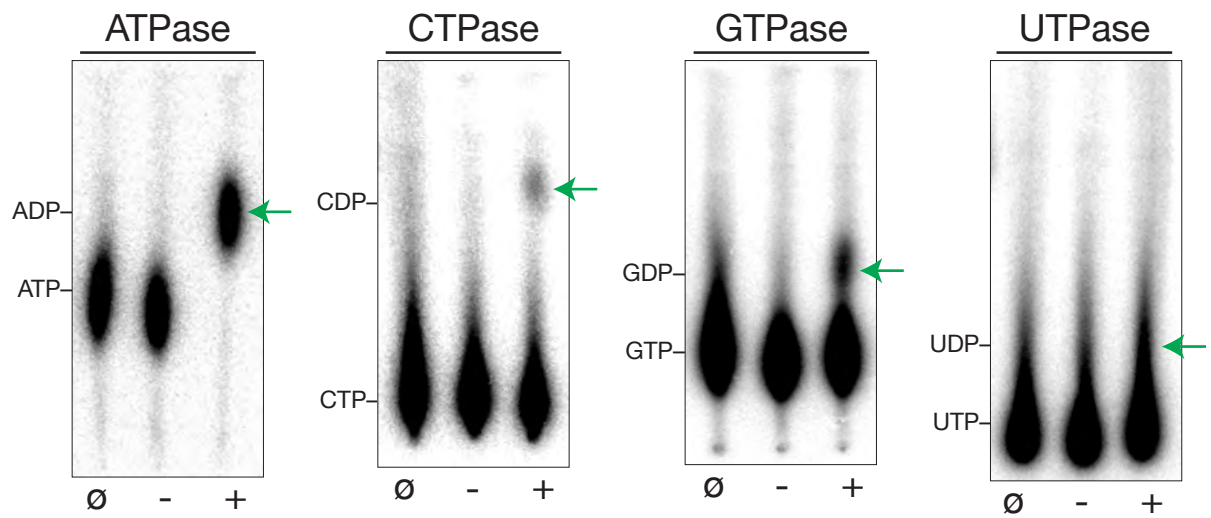

Figure S5

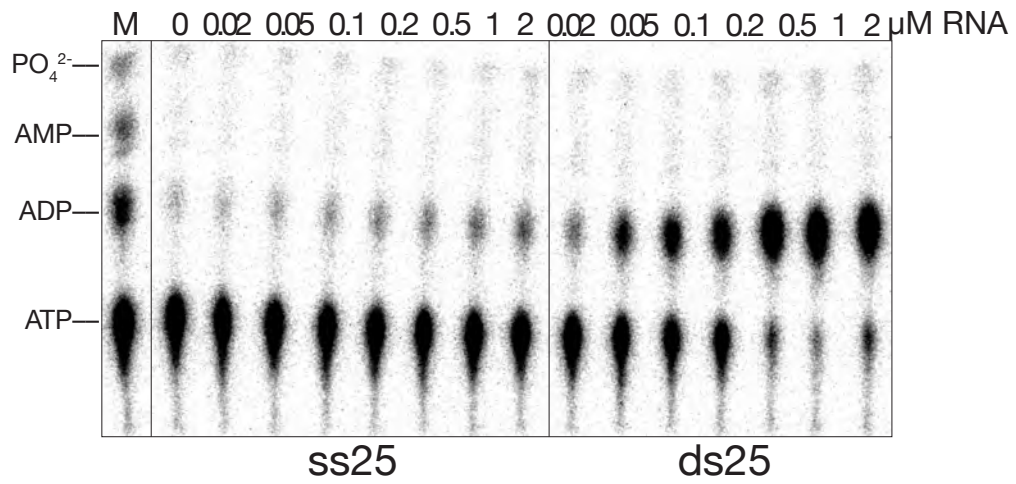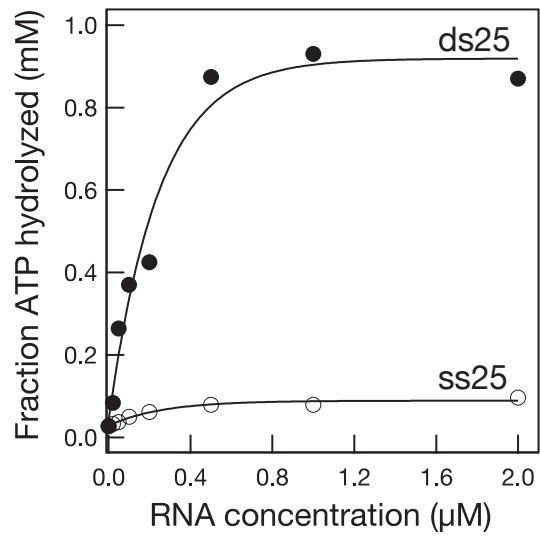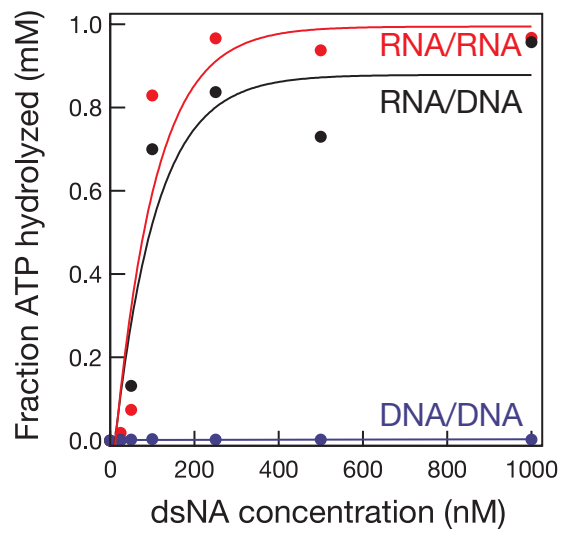



Figure S6

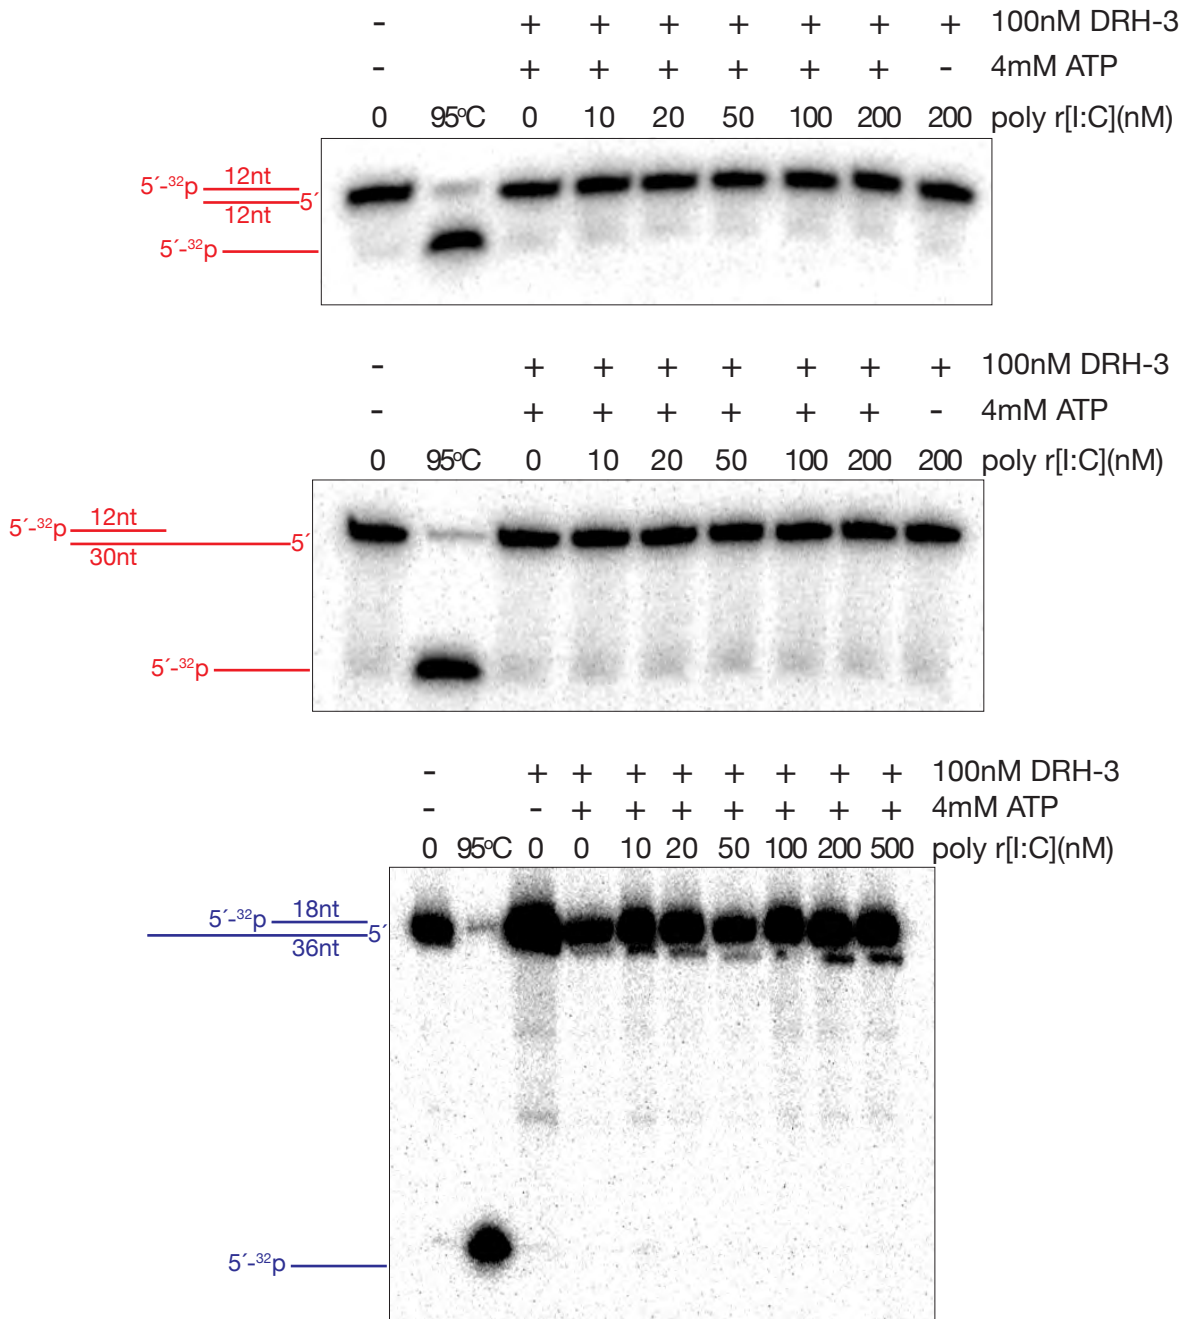

Figure S7

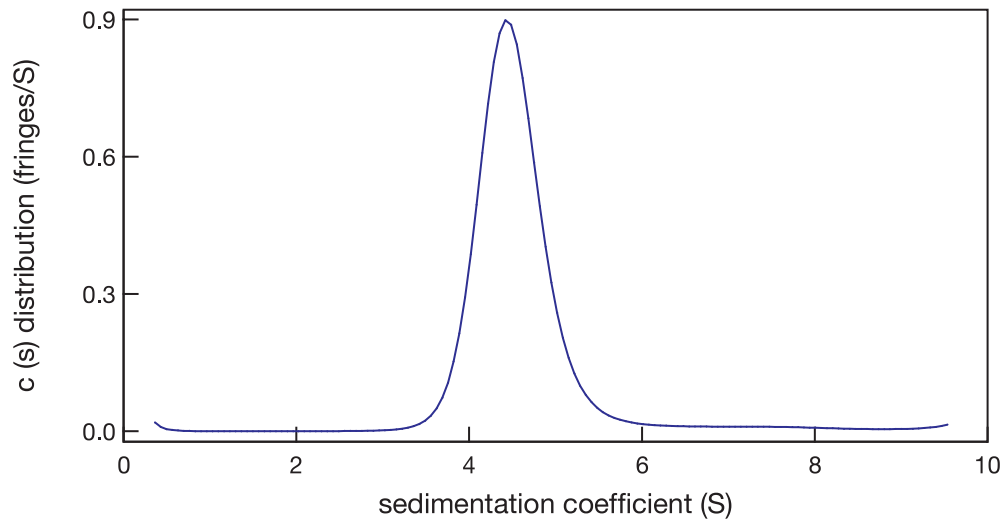

Figure S8

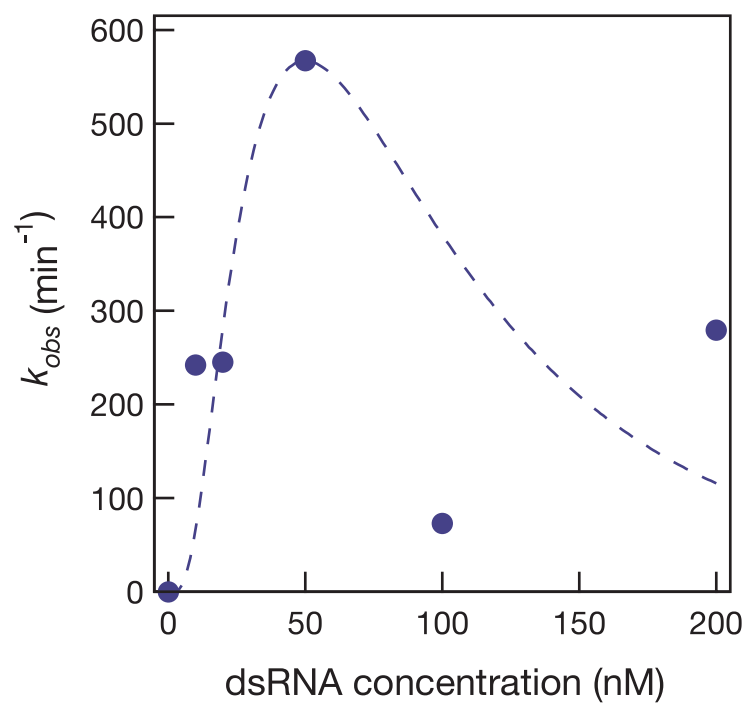

Supplement: supp_M110.117010_jbc.M110.117010-1.pdf [file supp_M110.117010_jbc.M110.117010-1.pdf]
